# Supplementary material for: MAIR‐II deficiency ameliorates cardiac remodelling post‐myocardial infarction by suppressing TLR9‐mediated macrophage activation
Source: PubMed Central journal article supplement (PMC7753988; doi:10.1111/jcmm.16070), 2020-11-02
Supplement: JCMM-24-14481-s001.pdf [file JCMM-24-14481-s001.pdf]

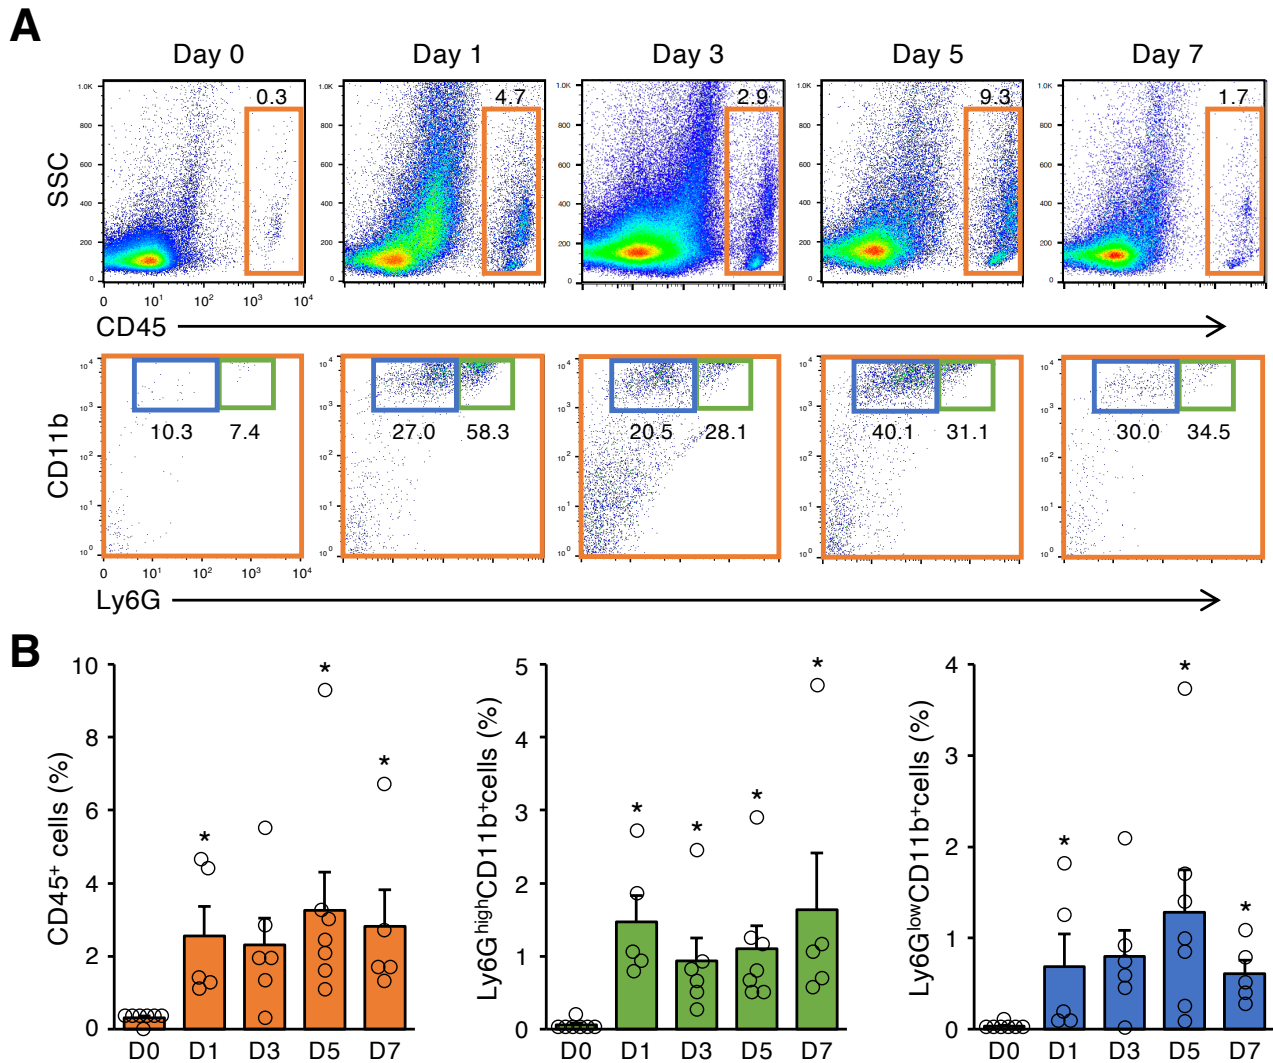

**Figure S1. Dynamics of inflammatory cells in infarcted myocardium.**

(A) Representative flow cytometric plots showing infiltrating inflammatory cells in infarcted hearts at the indicated time points. 7-AAD negative live cells were gated to determine leukocytes (CD45<sup>+</sup> cells, upper panels). Leukocytes were further gated to determine Ly6G<sup>high/low</sup>CD11b<sup>+</sup> myeloid cells (lower panels). (B) Quantification of inflammatory cells from infarcted hearts as a percentage of live cells at the indicated time points (n = 5-7). \**P* < 0.05 vs day 0 by Kruskal-Wallis analysis with a post-hoc Steel test.

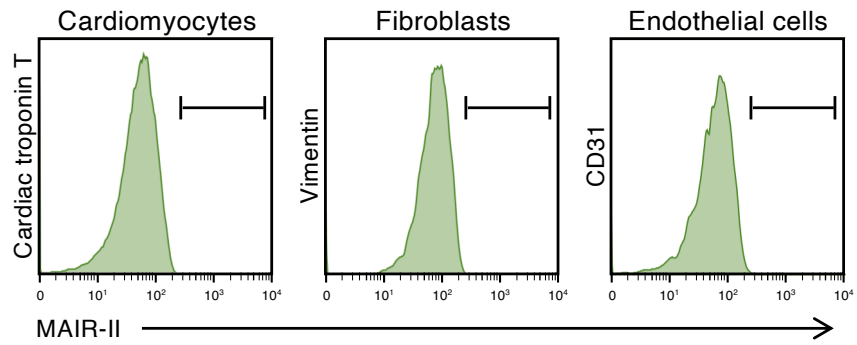

**Figure S2. Flow cytometric analysis of MAIR-II expression on cardiomyocytes, fibroblasts, and endothelial cells.**

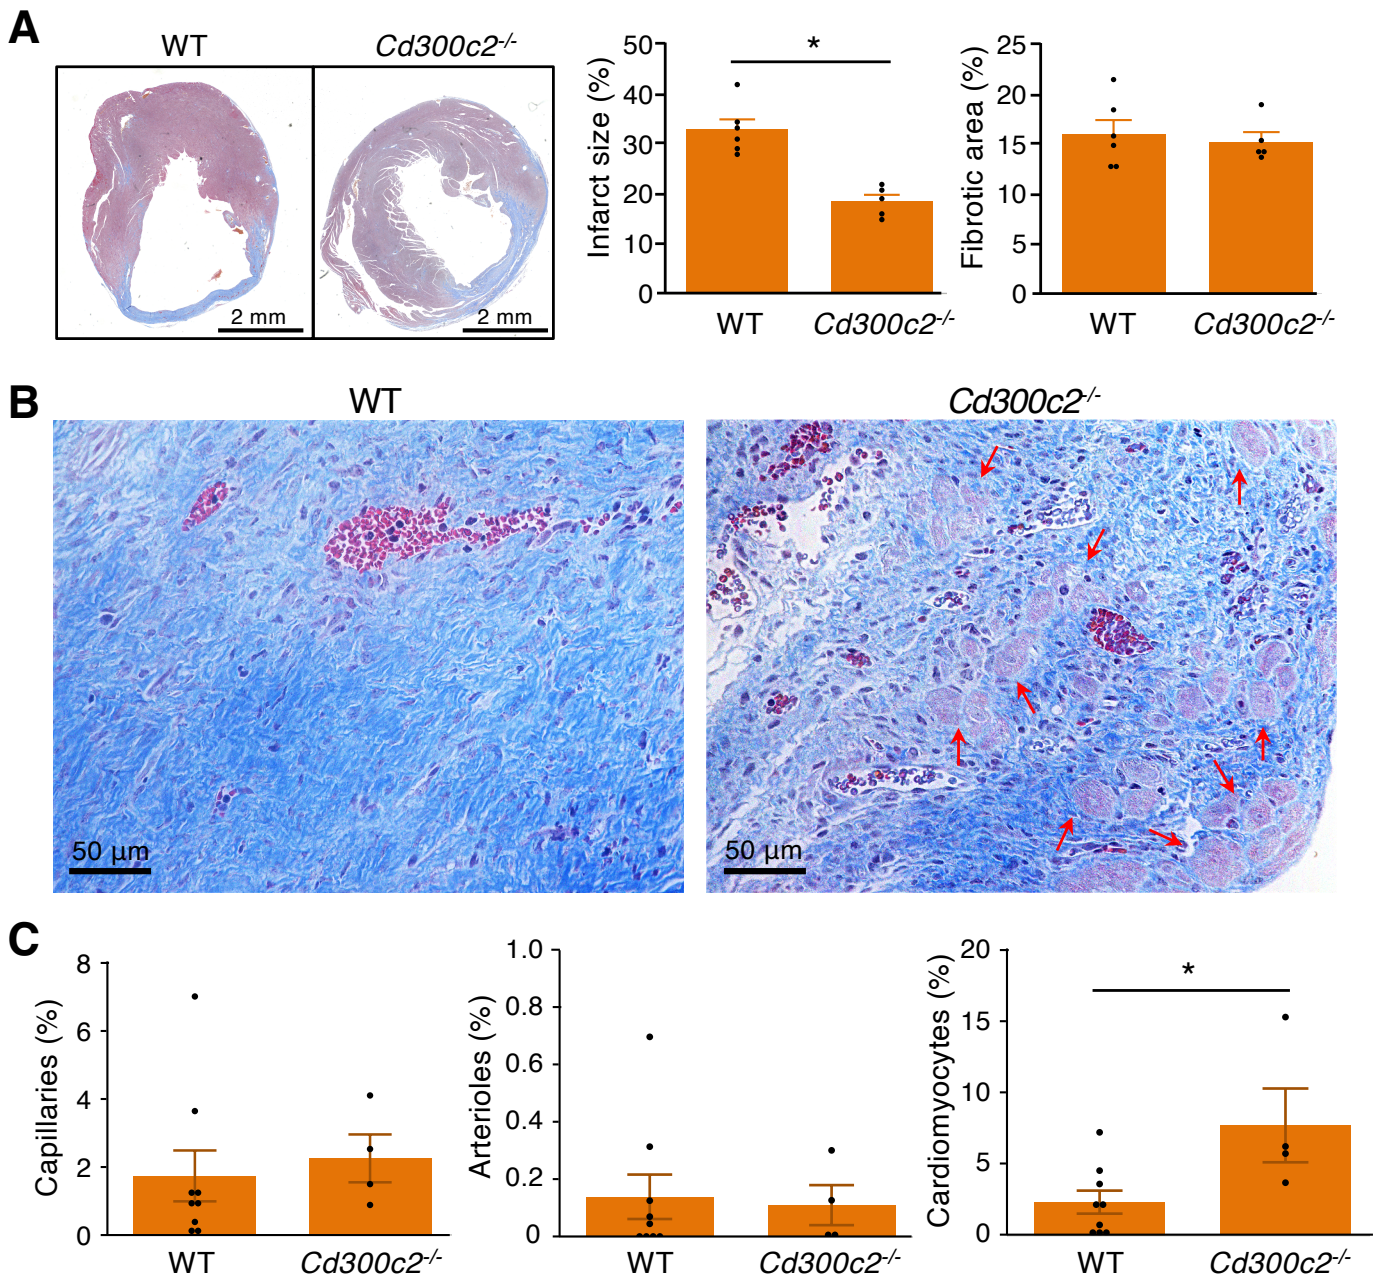

**Figure S3. Histological examination of the heart 14 days after MI.**

(A) Representative cross sections of heart tissue and the quantification of infarct sizes and fibrotic areas between WT and *Cd300c2<sup>-/-</sup>*. Results are presented as mean  $\pm$  SEM, n=5 each. (B) Representative cross sections of the infarct area. (C) The quantification of the amount of capillaries, arterioles, and cardiomyocytes in the infarct area 14 days post-MI. Results are presented as mean  $\pm$  SEM, n = 4-9. \* $P < 0.05$  by Mann-Whitney  $U$  test.

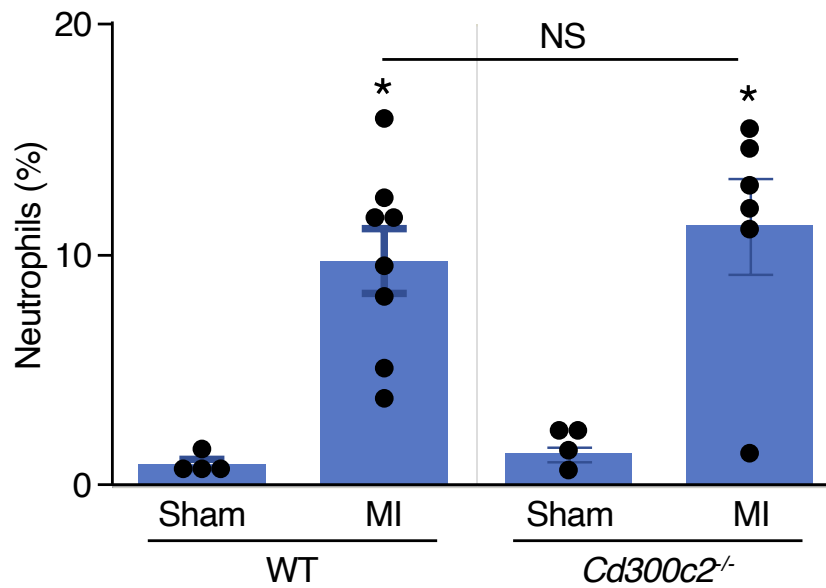

**Figure S4. Neutrophil infiltration in the heart.**

Quantification of Ly6G<sup>high</sup>CD11b<sup>+</sup> neutrophils as a percentage of live cells from WT and *Cd300c2*<sup>-/-</sup> hearts from sham and day 5 after MI. Results are presented as mean ± SEM, n = 4-8. \**P* < 0.05 vs sham by one-way ANOVA with Tukey's post hoc test.

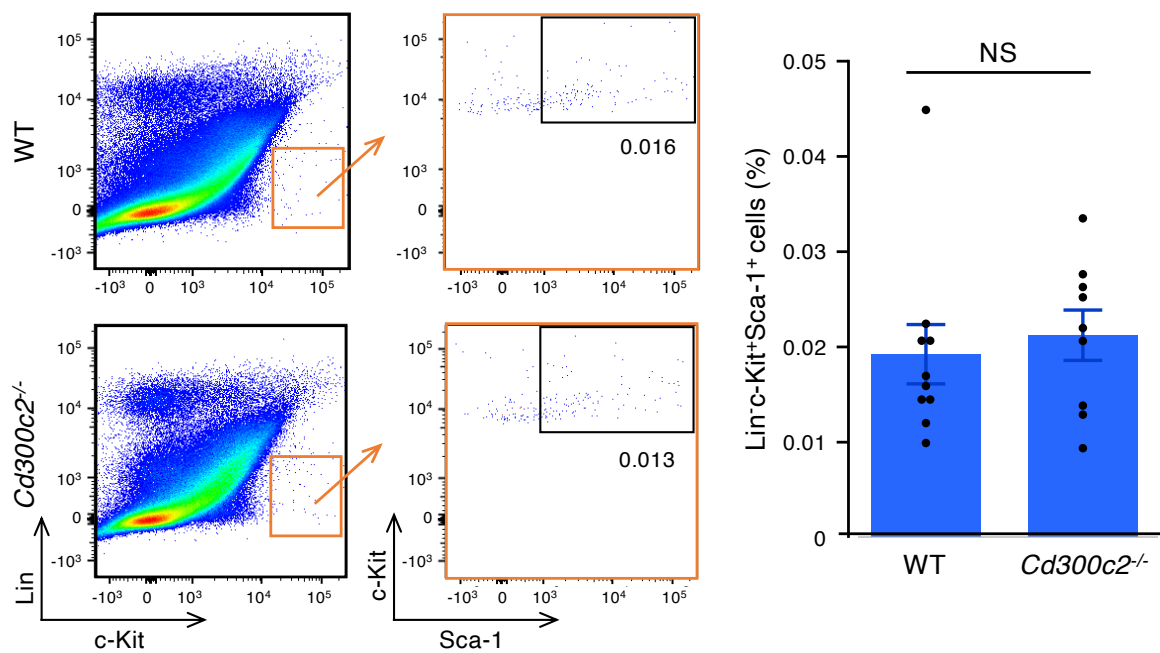

**Figure S5. Hematopoietic stem cell infiltration in the heart.**

Quantification of Lin<sup>+</sup>c-Kit<sup>+</sup>Sca-1<sup>+</sup> hematopoietic stem cells as a percentage of live cells in the infarcted hearts from WT and *Cd300c2*<sup>-/-</sup> mice 8 days after MI. Results are presented as mean ± SEM, n = 9-11.

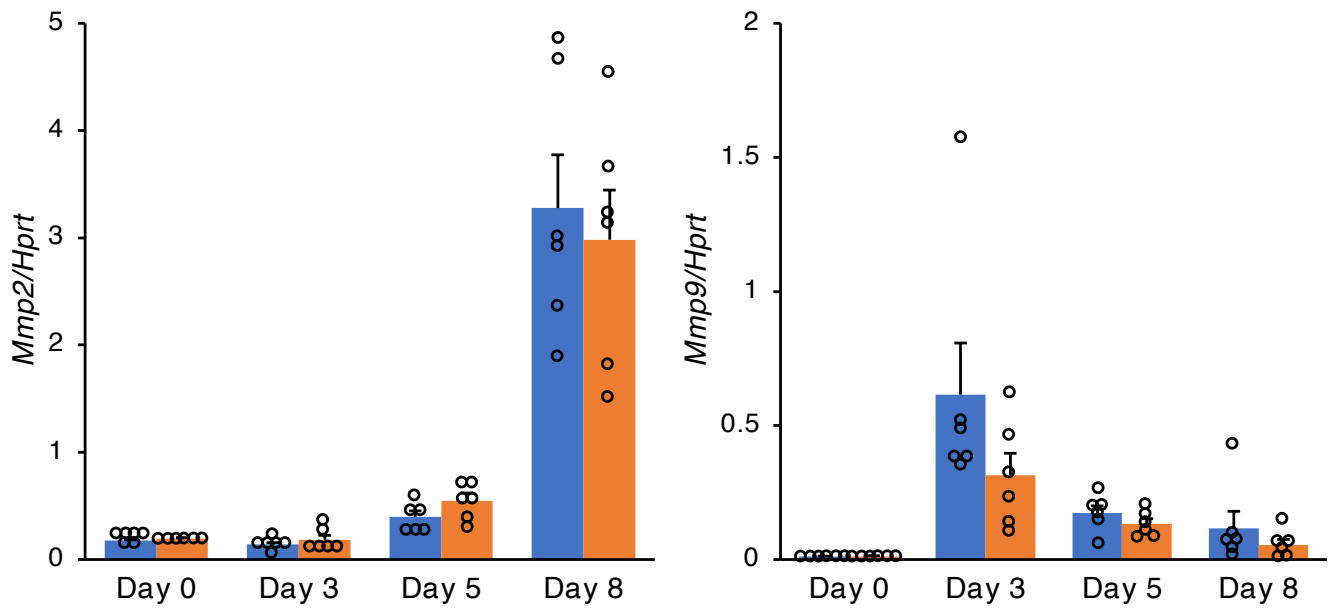

**Figure S6. Gene expression of MMPs in infarcted hearts.**

mRNA expression of MMPs in hearts from WT and *Cd300c2*<sup>-/-</sup> hearts. Results are presented as mean  $\pm$  SEM, n = 6-8.

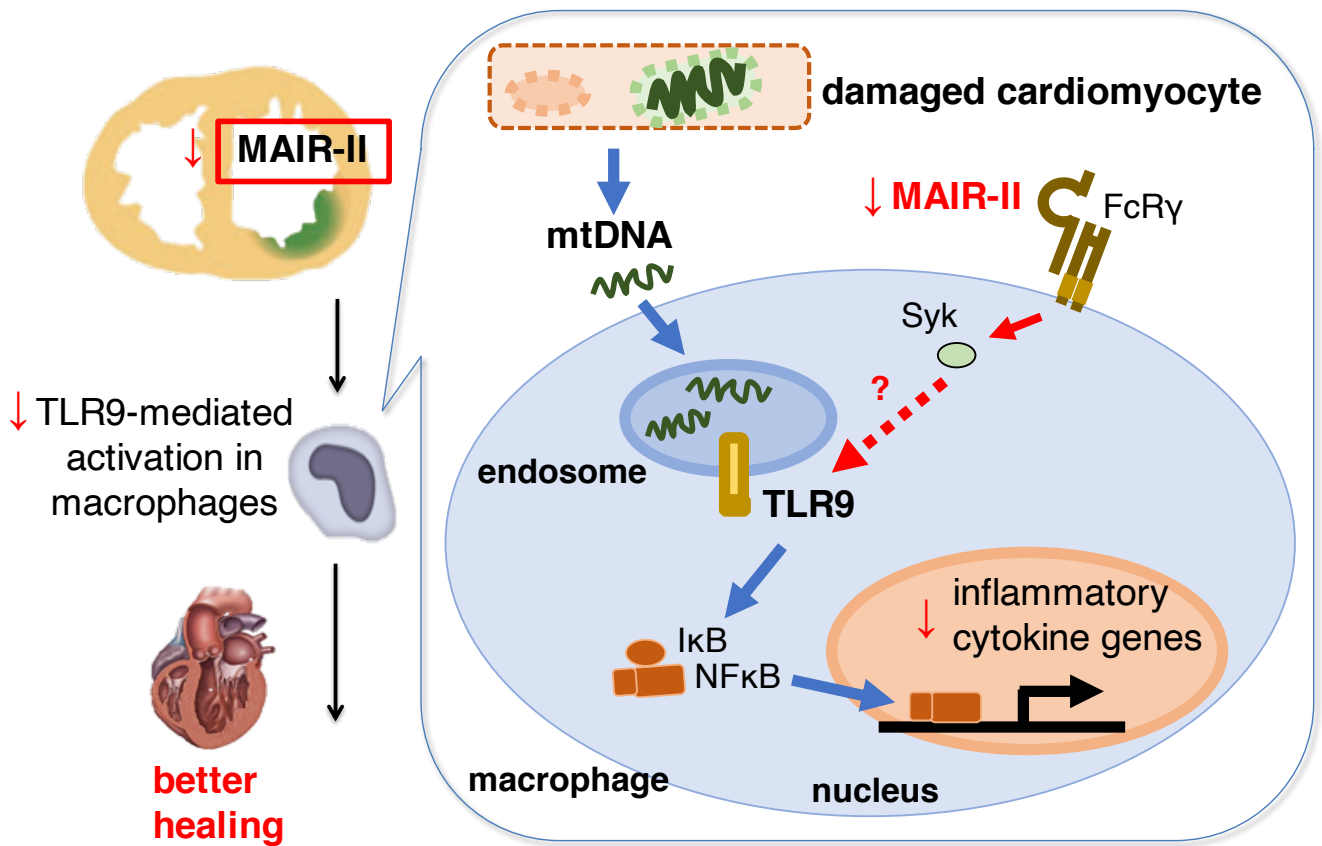

**Figure S7. MAIR-II deficiency prevents cardiac dysfunction post-MI.**

Damaged cardiomyocytes release mtDNA as a DAMP, which activates endosomal TLR9 in macrophages. Upon TLR9 activation, NF-κB-mediated inflammatory cytokine production is upregulated. However in MAIR-II deficiency, TLR9-mediated activation in macrophages is suppressed and thus a dampened inflammatory response results in better healing post-MI.
